# Supplementary material for: Crystal structures and solution behaviors of dinuclear d10-metal complexes containing anions of N,N′-bis(pyrimidine-2-yl)formamidine
Source: Royal Society of Chemistry journal article supplement (doi:10.1039/b703727a), 2007-01-01

## Supplementary Material

### 1. Varial-temperature spectra of **1a** in CD<sub>2</sub>Cl<sub>2</sub>.

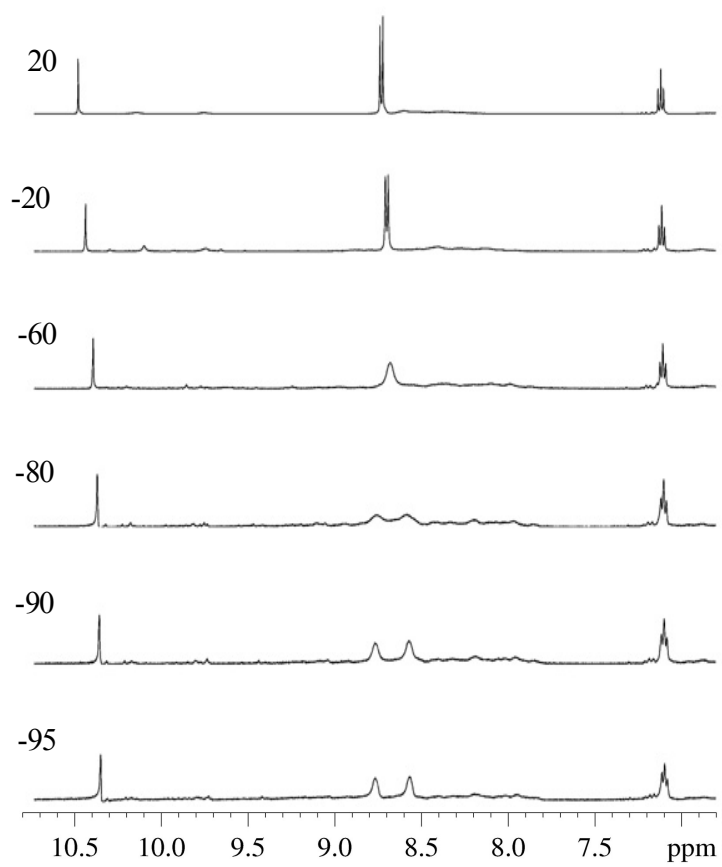

## 2. Varial temperature spectra of **1b** in CD<sub>2</sub>Cl<sub>2</sub>

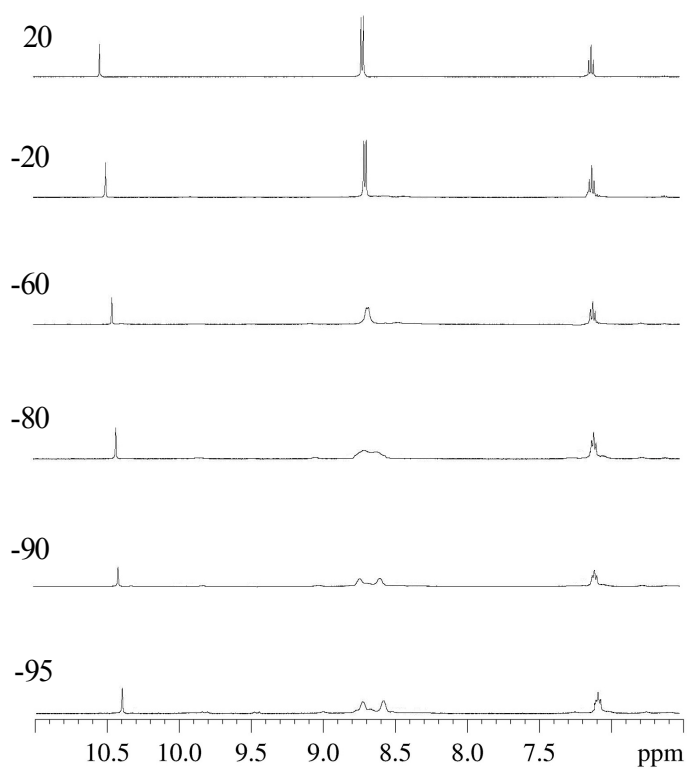

### 3. Varial temperature spectra of **1c** in CD<sub>2</sub>Cl<sub>2</sub>

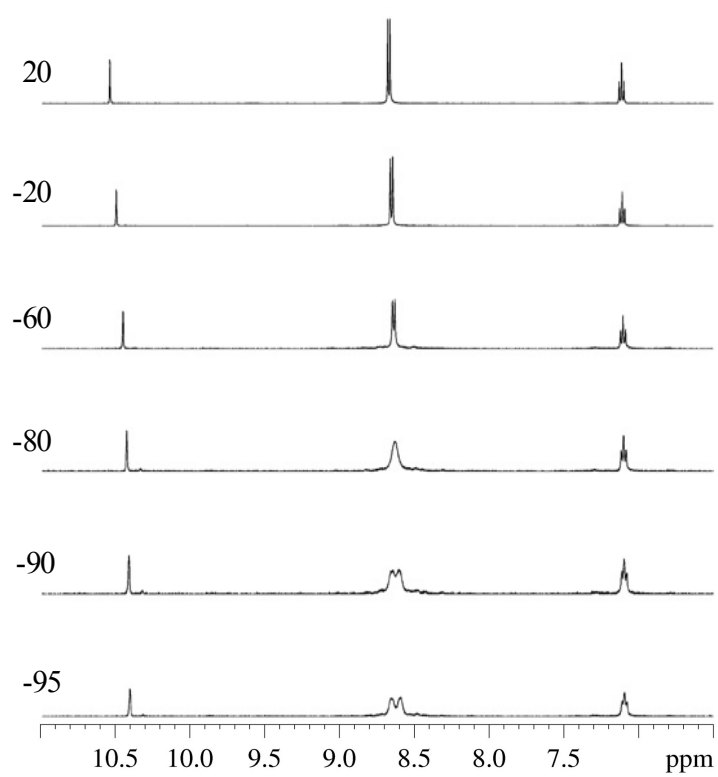

4. Varial temperature spectra of **2b** in CDCl<sub>3</sub>

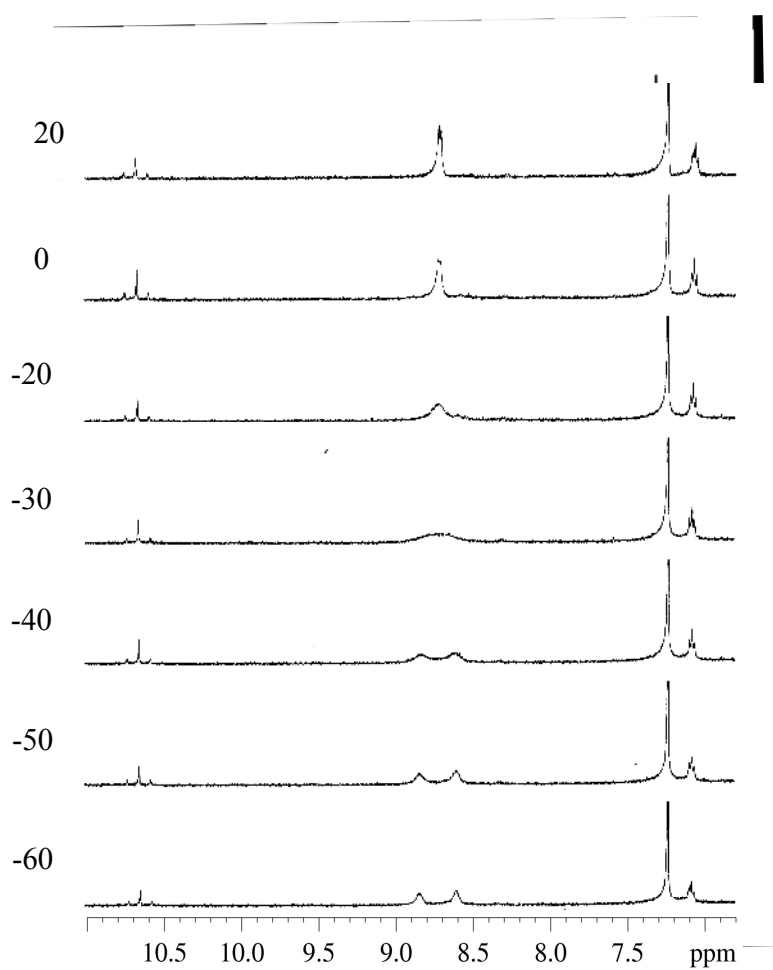

5. Varial-temperature spectra of **3a** in CD<sub>2</sub>Cl<sub>2</sub>.

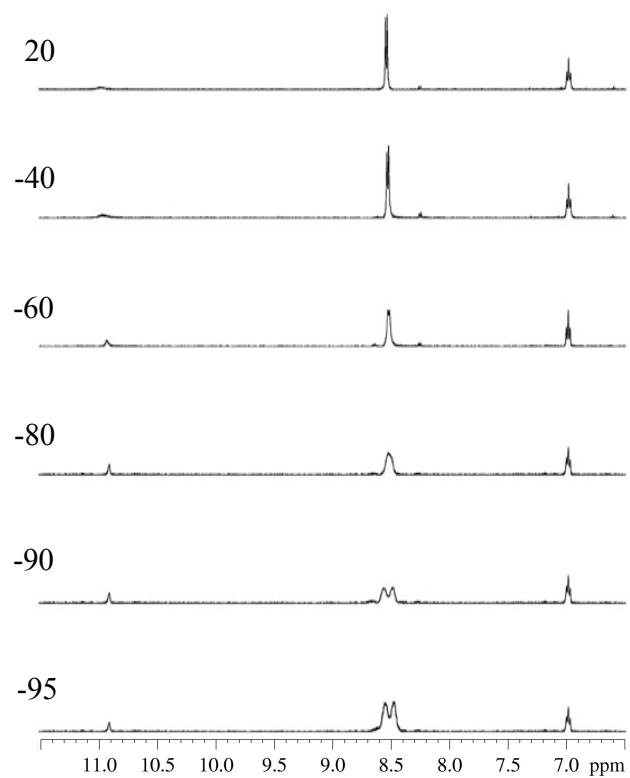

6. Varial temperature spectra of **3b** in CD<sub>2</sub>Cl<sub>2</sub>

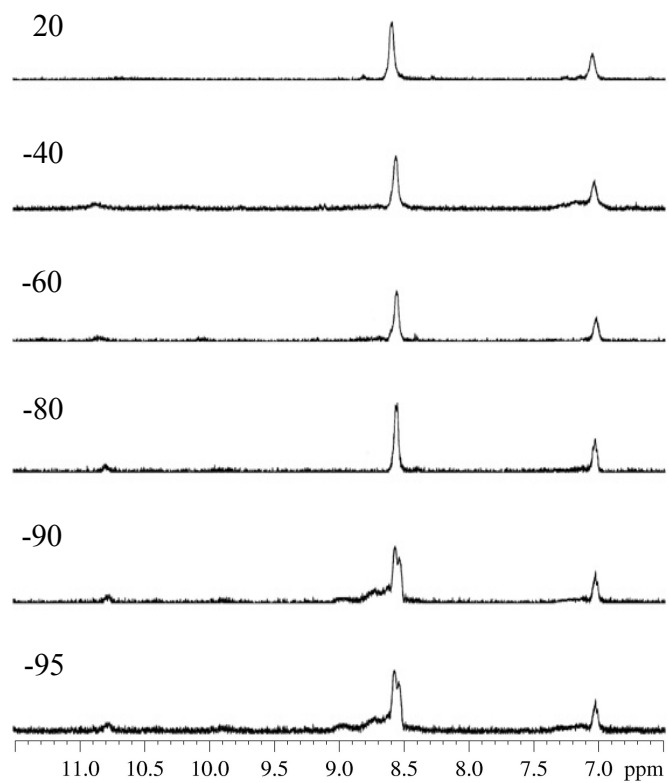

7. Varial temperature spectra of **3c** in CD<sub>2</sub>Cl<sub>2</sub>

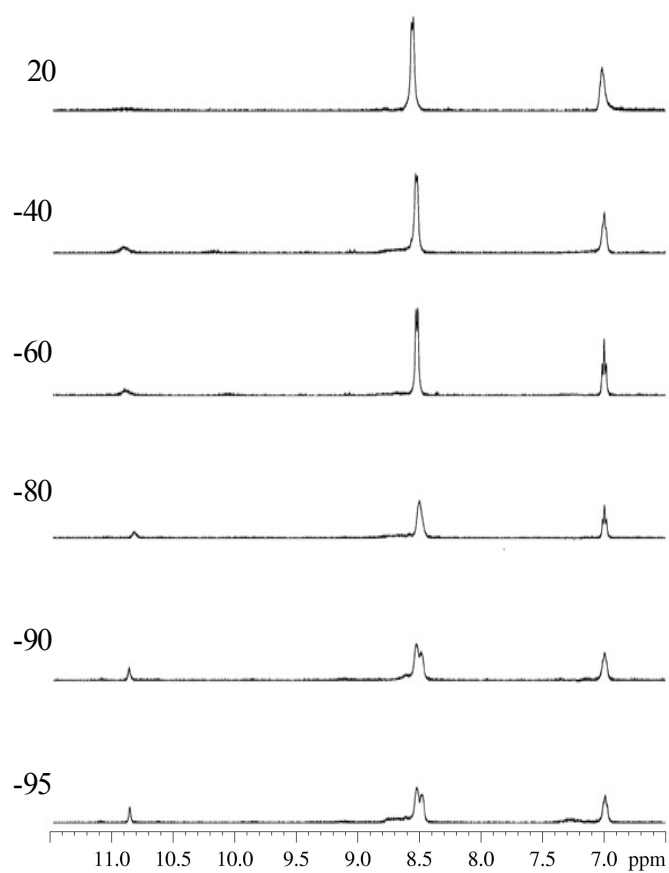

Supplement: b703727a.pdf [file b703727a.pdf]
